# Supplementary material for: Runx3-overexpression cooperates with ex vivo AKT inhibition to generate receptor-engineered T cells with better persistence, tumor-residency, and antitumor ability
Source: PubMed Central journal article supplement — J Immunother Cancer. 2023 Feb 27;11(2):e006119. doi: 10.1136/jitc-2022-006119 (PMC9972435; doi:10.1136/jitc-2022-006119), 2023-02-27
Supplement: jitc-2022-006119supp003.pdf [file jitc-2022-006119supp003.pdf]

**Supplementary Table S1: Antibodies for flow cytometry**

| Antibodies                                    | SOURCE          | IDENTIFIER     |
|-----------------------------------------------|-----------------|----------------|
| Purified anti-mouse CD3 $\epsilon$ Antibody   | BioLegend       | Cat#100302     |
| Purified anti-mouse CD28 Antibody             | BioLegend       | Cat#102116     |
| Biotin anti-mouse CD19 Antibody               | BioLegend       | Cat#115504     |
| Streptavidin Nanobeads                        | BioLegend       | Cat#480016     |
| BV605 anti-mouse CD45 Antibody                | BioLegend       | Cat#103140     |
| BV785 anti-mouse CD45 Antibody                | BioLegend       | Cat#103149     |
| APC/Cyanine7 anti-mouse CD4 Antibody          | BioLegend       | Cat#100414     |
| PE/Cyanine7 anti-mouse CD8a Antibody          | BioLegend       | Cat#100722     |
| BV510 anti-mouse/human CD44 Antibody          | BioLegend       | Cat#103044     |
| PE anti-mouse CD62L Antibody                  | BioLegend       | Cat#104408     |
| PerCP/Cyanine5.5 anti-mouse CD62L Antibody    | BioLegend       | Cat#104431     |
| PE anti-mouse TNF- $\alpha$ Antibody          | BioLegend       | Cat#506306     |
| APC anti-mouse IFN- $\gamma$ Antibody         | BioLegend       | Cat#505809     |
| PE/Cyanine7 anti-mouse IFN- $\gamma$ Antibody | BioLegend       | Cat#505825     |
| BV785 anti-mouse CD69 Antibody                | BioLegend       | Cat#104543     |
| AF700 anti-mouse CD103 Antibody               | BioLegend       | Cat#121441     |
| PerCP/Cyanine5.5 anti-mouse CD103 Antibody    | BioLegend       | Cat#121415     |
| APC anti-mouse Ki-67 Antibody                 | BioLegend       | Cat#652405     |
| FITC anti NWSHPQFEK Tag Antibody              | Genscript       | Cat#A01736     |
| Biotin anti NWSHPQFEK Tag Antibody            | Genscript       | Cat#A01737     |
| APC Streptavidin                              | BioLegend       | Cat#405207     |
| PE anti-mouse CD192 (CCR2) Antibody           | BioLegend       | Cat#150609     |
| Bv785 anti-mouse CD366 (Tim-3) Antibody       | BioLegend       | Cat#119725     |
| BV421 anti-mouse CD279 (PD-1) Antibody        | BD Biosciences  | Cat#565942     |
| BV421 anti-human/mouse Granzyme B Antibody    | BioLegend       | Cat#396413     |
| APC anti-human CA9 antibody                   | R&D Systems     | Cat#FAB2188A   |
| Recombinant human CA9 Protein (hFc Tag)       | Sino Biological | Cat#10107-H02H |
| APC anti-human IgG Fc Antibody                | BioLegend       | Cat#410712     |
| APC anti-human CD69 Antibody                  | BioLegend       | Cat#310909     |
| FITC anti-human CD62L Antibody                | BioLegend       | Cat#304804     |

**Supplementary Table S2: Antibodies for CyTOF**

| Metal labels | Antibodies                                         | SOURCE    | IDENTIFIER  |
|--------------|----------------------------------------------------|-----------|-------------|
| 89Y          | Purified anti-mouse CD45 (Maxpar® Ready) Antibody  | BioLegend | Cat#103141  |
| 115In        | Purified anti-mouse CD279 (Maxpar® Ready) Antibody | BioLegend | Cat#109113  |
| 141Pr        | Purified anti-mouse CD103 Antibody                 | BioLegend | Cat#121402  |
| 142Nd        | Purified anti-mouse CD197 (CCR7) Antibody          | BioLegend | Cat#120101  |
| 143Nd        | Purified anti-mouse CD19 (Maxpar® Ready) Antibody  | BioLegend | Cat#115547  |
| 146Nd        | Purified anti-mouse CD8a (Maxpar® Ready) Antibody  | BioLegend | Cat#100755  |
| 150Nd        | Purified anti-mouse CD127 (Maxpar® Ready) Antibody | BioLegend | Cat#135029  |
| 151Eu        | Purified anti-mouse CD62L (Maxpar® Ready) Antibody | BioLegend | Cat#104443  |
| 152Sm        | Purified anti-mouse CD69 (Maxpar® Ready) Antibody  | BioLegend | Cat#104533  |
| 153Eu        | Purified anti-mouse CD11b (Maxpar® Ready) Antibody | BioLegend | Cat#101249  |
| 154Sm        | Purified anti-mouse CD3ε (Maxpar® Ready) Antibody  | BioLegend | Cat#100345  |
| 160Gd        | Purified anti-mouse CD49a Antibody                 | BioLegend | Cat#142602  |
| 165Ho        | Purified anti-mouse CD186 (CXCR6) Antibody         | BioLegend | Cat#151102  |
| 166Er        | Purified anti-human/mouse CLA Antibody             | BioLegend | Cat#321302  |
| 167Er        | Purified anti-mouse CD11a Antibody                 | BioLegend | Cat#162902  |
| 168Er        | Purified anti-mouse CD44 (Maxpar® Ready) Antibody  | BioLegend | Cat#103051  |
| 169Tm        | Purified anti-mouse CD183 (CXCR3) Antibody         | BioLegend | Cat#126502  |
| 172Yb        | Purified anti-mouse CD366 (Tim-3) Antibody         | BioLegend | Cat#119702  |
| 173Yb        | Purified anti-mouse CD223 (LAG-3) Antibody         | BioLegend | Cat#125202  |
| 174Yb        | Purified anti-mouse IFN-γ Antibody                 | BioLegend | Cat#505802  |
| 175Lu        | Purified anti-human/mouse Granzyme B Antibody      | BioLegend | Cat#372202  |
| 176Yb        | Purified anti-mouse Ki-67 Antibody                 | BioLegend | Cat#652402  |
| 191Ir        | Cell-ID Intercalator-Ir                            | Fluidigm  | Cat#201192A |
| 193Ir        | Cell-ID Intercalator-Ir                            | Fluidigm  | Cat#201192A |
| 194Pt        | Cell-ID™ Cisplatin                                 | Fluidigm  | Cat#201064  |
| 198Pt        | Purified anti-mouse CD4 (Maxpar® Ready) Antibody   | BioLegend | Cat#100561  |

## Supplementary methods

### B cell removal from murine primary lymphocytes

Briefly, the activated spleen cells were resuspended to  $1 \times 10^8$ /ml in medium with 10  $\mu$ g/ml biotin anti-mouse-CD19 antibodies and incubated at 4 °C for 30min, followed by centrifugation at 500g for 5 min and resuspension in medium with 20  $\mu$ l/ml MojoSort™ Streptavidin Nanobeads. After another round of incubation at 4 °C for 30min, the CD19+ B cells were labeled with Nanobeads and then removed by MojoSort™ Magnet (Cat#480019, biolegend).

### Immunoblotting

The protocol for immunoblotting had been described previously.<sup>1</sup> Antibodies for immunoblotting were obtained from the following sources: anti-AKT (pan) (4685, Cell Signaling Technology, 1:1000), anti-Phospho-AKT (Ser473) (4060, Cell Signaling Technology, 1:2000), anti-GAPDH (AF5009, Beyotime, 1:1000), HRP goat anti-rabbit IgG (A0208, Beyotime, 1:2000), HRP goat anti-mouse IgG (A0216, Beyotime, 1:2000).

### *In vitro* killing assay

Approximately 5,000 target (KPC-hCA9 or Bxpc3-hCA9) cells were plated in each well of 96-well plates, followed by T cell addition at a ratio of 2:1, 1:1, 1:2, or zero. Fourteen hours later, target cells adhered to the surface of plates and T cells were resuspended and discarded. Then, 100  $\mu$ l of medium with 10% Cell Counting Kit-8 (CCK-8; DOJINDO) was added into each well, followed by incubation at 37 °C for 1 hour. The OD450 was measured using a microplate reader. The lysis percentage was calculated as:  $\text{lysis\%} = 100 - (\text{OD}_{450\text{each well}} - \text{OD}_{450\text{blank}}) / (\text{OD}_{450\text{zero}} - \text{OD}_{450\text{blank}}) \times 100$ . Blank wells contained only CCK-8 medium.

### Flow cytometry analysis and cell sorting

Tissues were digested and immune cells were enriched using 36%-Percoll gradient centrifugation.<sup>2</sup> Cells were blocked and then stained for cell surface epitopes.<sup>2</sup> Cells were permeabilized using a Foxp3/Transcription Factor Staining Buffer Set (ebioscience) before intracellular epitope staining. The antibodies are listed in Online Supplementary Table S1. Labeled cells were analyzed on a five-laser flow cytometer (Fortessa, BD) or sorted on a MoFlo Astrios EQ Cell Sorter (Beckman Coulter). Data were analyzed using FlowJo software (TreeStar). Data with few live cells were excluded.

### **Cytometry by time of flight (CyTOF) mass cytometry**

Antibodies were mostly labelled with metals using Maxpar MCP9 antibody labelling kits (Fluidigm). The antibodies used are listed in Online Supplementary Table S2. Cells were labeled and then analyzed on a mass cytometer (Fluidigm, Helios). The cytofkit R package was used for t-distributed stochastic neighbor embedding (t-SNE) and PhenoGraph analysis.<sup>3</sup>

### **Cell staining for CyTOF**

Resuspend 1–3 million cells in 200  $\mu$ L Maxpar Cell Staining Buffer with 0.5 $\mu$ M Cell-ID™ Cisplatin and stain at room temperature (the same below) for 2min, followed by FcR blocking in 50  $\mu$ L Maxpar Cell Staining Buffer for 10min. Add 50  $\mu$ L of the surface marker antibody cocktail to each tube and stain for 30min, followed by washing with 500  $\mu$ L Maxpar Cell Staining Buffer twice. Cells were permeabilized using a Foxp3/Transcription Factor Staining Buffer Set (ebioscience, cat#00-5523) before intracellular epitopes staining. Resuspend cells in 50  $\mu$ L 1xPermeabilization with intracellular antibody cocktail and stain for 30min, followed by washing with 500  $\mu$ L 1xPermeabilization Buffer twice. Resuspend cells in 200  $\mu$ L Maxpar Fix and Perm Buffer with 125nM Cell-ID Intercalator-Ir and stain at 4 °C over night.

### **Bulk mRNA-seq**

Total RNA was extracted from CAR-T cells using Trizol LS Reagent (Cat#10296010, Invitrogen). TruSeq strand-specific kit (Illumina) was used for mRNA-seq library preparation, followed by sequencing using

Illumina NovaSeq 6000 platforms. Differential expression analysis was performed using DESeq2 R package. ClusterProfiler R package was used to test the statistical enrichment of differential expression genes in KEGG pathways.

### Plasmid construction of the 3rd generation human CAR

The 3<sup>rd</sup> generation human chimeric antigen receptor (hCAR) was pieced together using human CD8 $\alpha$  signal peptide, anti-human-CAIX scFv, the hinge and transmembrane domains of human CD8 $\alpha$ , the cytoplasmic domains of human CD28, 4-1BB, and CD3 $\zeta$ .<sup>4</sup> The hCAR was cloned into the pLVX-EF1 $\alpha$ -IRES-Puromycin lentiviral plasmid backbone (Cat#134665, Addgene) through EcoRI and MluI site to achieve overexpression. The human Runx3 cDNA was linked following hCAR through P2A self-cleaving peptide to achieve co-expression. Gene fragments were generated by chemical synthesis. The final plasmids were confirmed by Sanger sequencing.

### Lentivirus production and human primary T cell transduction

Lentiviral supernatant was produced in the HEK293T cell line and concentrated by ultracentrifugation as previously described.<sup>4</sup> Peripheral blood mononuclear cells (PBMCs) were isolated from peripheral blood of healthy donors using Human Lymphocyte Separation Medium (Solarbio) according to manufacturer's instructions. The PBMCs were activated with Dynabeads Human T-Activator CD3/CD28 (Gibco) and transduced with lentiviruses as previous described.<sup>4</sup> Transduced cells were resuspended after 4 hours and transferred to 12-well plates for expansion in the presence of 1 $\mu$ M AKTi-1/2 or vehicle. T cells were maintained in AIM-V Medium (Gibco) supplemented with 5% Immune Cell Serum Replacement (Gibco), 100IU/ml IL-2 and 0.05mM 2-mercaptoethanol.

### reference

1. Zhang X, Huang X, Xu J, *et al.* NEK2 inhibition triggers anti-pancreatic cancer immunity by targeting PD-L1. *Nat Commun.* 2021;12(1):4536.
2. Sheng J, Zhang J, Wang L, *et al.* Topological analysis of hepatocellular carcinoma tumour microenvironment based on imaging mass cytometry reveals cellular neighbourhood regulated reversely by macrophages with different ontogeny. *Gut.* 2021.
3. Chen H, Lau MC, Wong MT, *et al.* Cytokit: A Bioconductor Package for an Integrated Mass Cytometry Data Analysis Pipeline. *PLoS Comput Biol.* 2016;12(9):e1005112.
4. Cui J, Zhang Q, Song Q, *et al.* Targeting hypoxia downstream signaling protein, CAIX, for CAR T-cell therapy against glioblastoma. *Neuro Oncol.* 2019;21(11):1436-46.
